# Supplementary material
Source: PubMed Central journal article supplement (PMC4136690)
Supplement: cb500257s_si_001.pdf [file cb500257s_si_001.pdf]

## **Supporting Information**

# **Rational Design, Preparation and Characterization of a Therapeutic Enzyme Mutant with Improved Stability and Function for Cocaine Detoxification**

Lei Fang<sup>a</sup>, K. Martin Chow<sup>b</sup>, Shurong Hou<sup>a</sup>, Liu Xue<sup>a</sup>, David W. Rodgers<sup>b</sup>, Fang Zheng<sup>a</sup>,  
and Chang-Guo Zhan<sup>a\*</sup>

*<sup>a</sup>Molecular Modeling and Biopharmaceutical Center and Department of Pharmaceutical  
Sciences, College of Pharmacy, University of Kentucky,  
789 South Limestone Street, Lexington, KY 40536*

*<sup>b</sup>Department of Molecular and Cellular Biochemistry and Center for Structural  
Biology, University of Kentucky, 741 South Limestone Street, Lexington, KY 40536*

X-ray crystallography data collection and refinement statistics (Table S1). Backbone superposition between the X-ray crystal structures of E172-173 and E196-301 (Figure S1). Time-dependence of important H<sup>+</sup>O distances (relevant to hydrogen bonds) from the MD-simulated E172-173 and E196-301 structures (Figure S2). Intermonomer disulfide bonds in the CocE mutant (E196-301) dimer refined in space group P6<sub>5</sub> (Figure S3).

---

\*Corresponding author. E-mail: zhan@uky.edu

**Table S1.** Data collection and refinement statistics.

|                           |                                                                    |
|---------------------------|--------------------------------------------------------------------|
| Wavelength (Å)            | 1.0                                                                |
| Resolution range (Å)      | 50-2.34 (2.42-2.34) <sup>a</sup>                                   |
| Space group               | P 6 <sub>5</sub> 22                                                |
| Unit cell                 | a=b=106.6 Å c=220.532 Å $\alpha=\beta=90^\circ$ $\gamma=120^\circ$ |
| Total reflections         | 561710                                                             |
| Unique reflections        | 31943                                                              |
| Multiplicity              | 17.5 (9.9)                                                         |
| Completeness (%)          | 99.73 (97.41)                                                      |
| Mean I/sigma(I)           | 17.71 (2.70)                                                       |
| Wilson B-factor           | 28.84                                                              |
| R-sym                     | 0.161 (0.956)                                                      |
| R-factor                  | 0.1769 (0.2488)                                                    |
| R-free                    | 0.2208 (0.3348)                                                    |
| Number of atoms           | 4793                                                               |
| macromolecules            | 4364                                                               |
| water                     | 429                                                                |
| Protein residues          | 571                                                                |
| RMS(bonds)                | 0.005                                                              |
| RMS(angles)               | 0.89                                                               |
| Ramachandran favored (%)  | 95                                                                 |
| Ramachandran outliers (%) | 0                                                                  |
| Clashscore                | 5.37                                                               |
| Average B-factor          | 27.80                                                              |
| macromolecules            | 27.40                                                              |
| solvent                   | 31.80                                                              |

<sup>a</sup>Statistics for the highest-resolution shell are shown in parentheses.

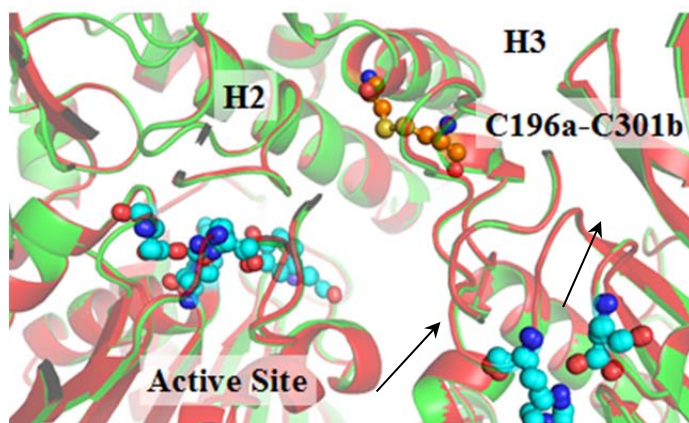

**Figure S1.** Backbone superposition between the X-ray crystal structures of E172-173 and E196-301. E172-173 is represented in green ribbons, and E196-301 is represented in red ribbons. The black arrow indicates the shift direction. Here, E172-173 represents T172R/G173Q CocE, and E196-301 refers to T172R/G173Q/L196C/I301C CocE.

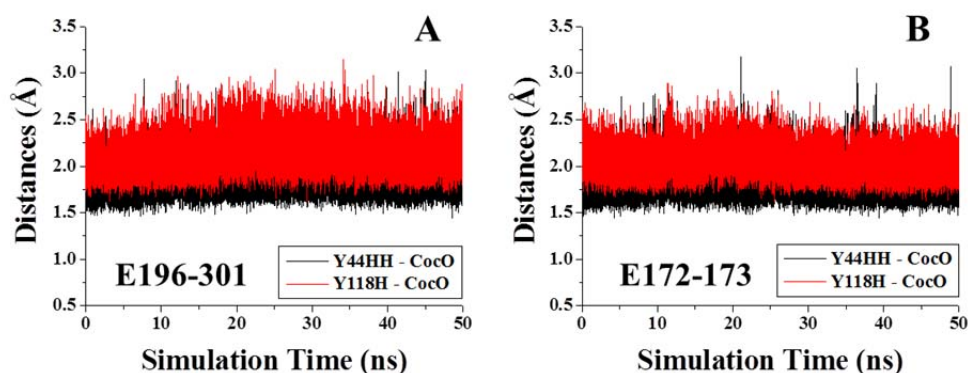

**Figure S2.** Time-dependence of important H $\cdots$ O distances (relevant to hydrogen bonds) from the MD-simulated E172-173 and E196-301 structures. Y44HH-CocO represents the distance between the hydroxyl hydrogen (denoted as HH) of the Y44 side chain and the carbonyl oxygen (denoted as CocO) of (-)-cocaine benzoyl ester. Y118H-CocO refers to the distance between hydrogen (H) of the Y118 backbone and the carbonyl oxygen (CocO) of (-)-cocaine benzoyl ester. E172-173 refers to T172R/G173Q CocE, and E196-301 refers to T172R/G173Q/L196C/I301C CocE.

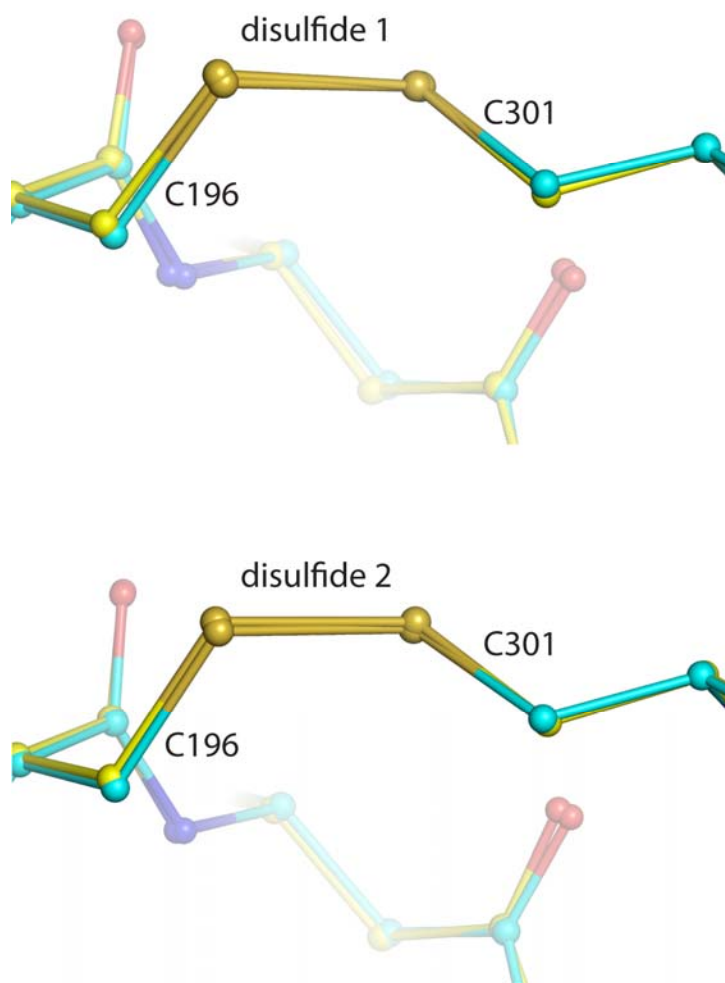

**Figure S3.** Intermonomer disulfide bonds in the CocE mutant (E196-301) dimer refined in space group  $P6_5$ . The complete process of structure determination was carried out in a space group with lower symmetry than the true space group ( $P6_522$ ) in order to assess the effects of the dimer being located on a crystallographic two-fold axis. Noncrystallographic symmetry restraints were not used during refinement. The panels show the two, now not strictly identical, disulfide bonds for the final model ( $R_{\text{work}} = 0.17$ ,  $R_{\text{free}} = 0.21$ ; yellow carbons) superimposed on the identical disulfide bonds in the model refined on the crystallographic two-fold axis (cyan carbons).
